# Supplementary material for: A Robust Drug–Target Interaction Prediction Framework with Capsule Network and Transfer Learning
Source: MDPI journal article supplement (doi:10.3390/ijms241814061), 2023-09-14
Supplement: s1 [file s1]

## Supplementary

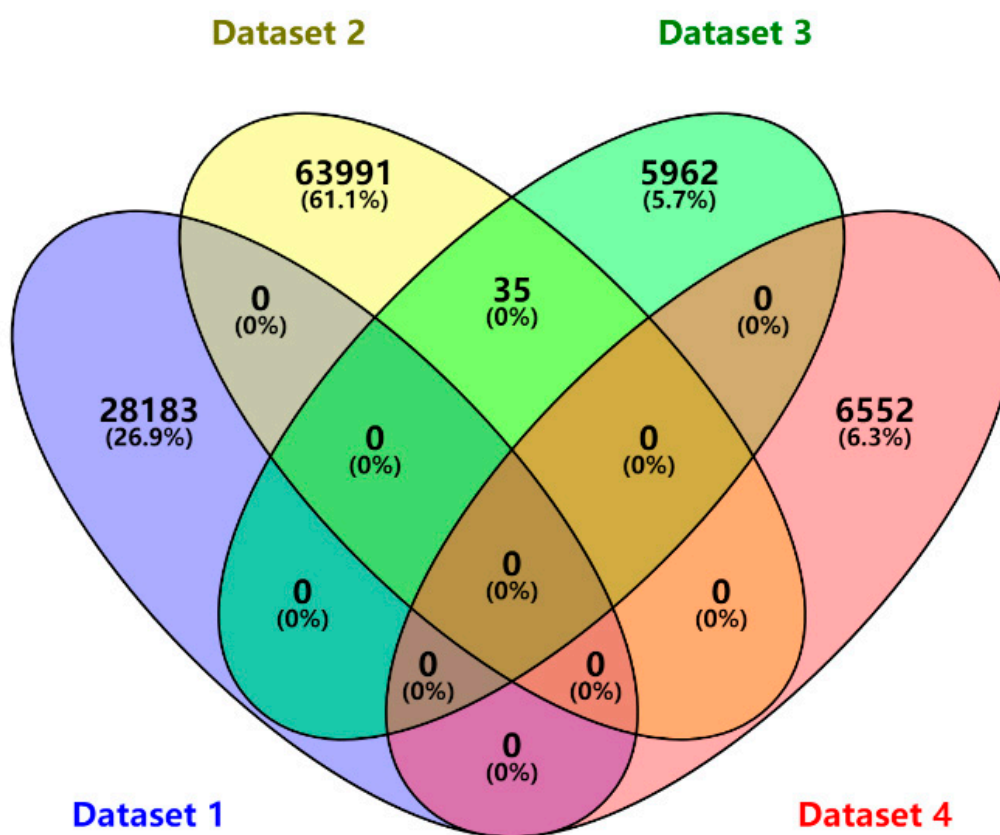

Figure S1. Venn diagram of the four DTI datasets.

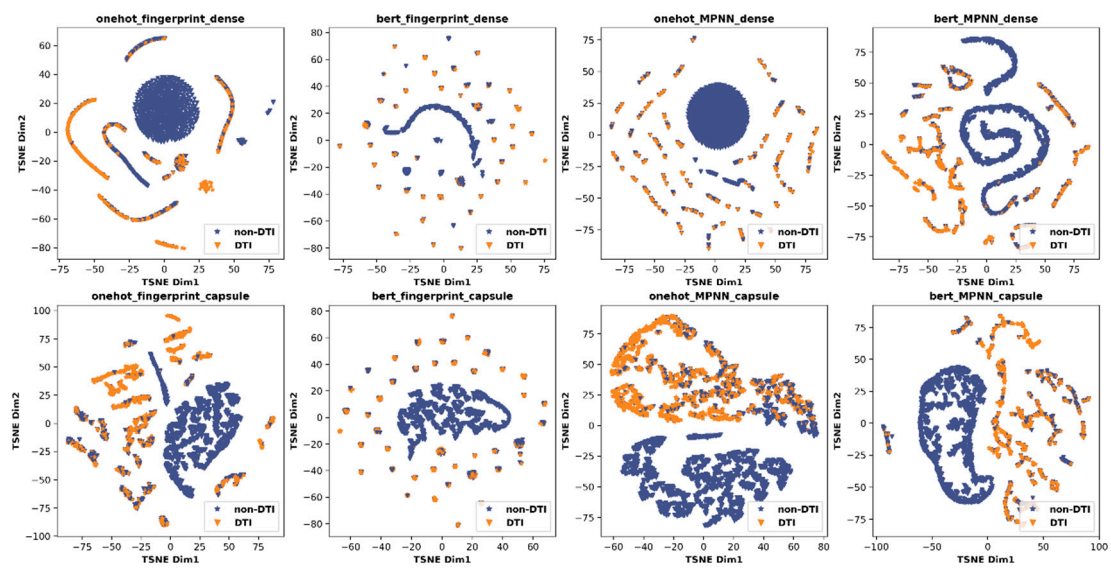

**Figure S2. t-SNE visualizations of the proposed model and 7 baseline models on Dataset 1.**

**Table S1 Classification and percentage of target proteins in 4 datasets**

[illegible]

**Table S2 Hyperparameters settings for CapBM-DTI**

| <b>Hyperparameters</b> | <b>Search space</b> | <b>Best parameters</b> |
|------------------------|---------------------|------------------------|
| target_dense           | [200,400]           | 200                    |
| routings               | [3,6]               | 3                      |
| kernel_size            | [5,10]              | 5                      |
| message_units          | -                   | 64                     |
| message_steps          | -                   | 4                      |
| num_attention_heads    | -                   | 8                      |
| dense_units            | -                   | 512                    |
| batch_size             | -                   | 64                     |
| epoch                  | -                   | 1000                   |
| loss                   | -                   | binary entropy         |
| optimizer              | -                   | Adam                   |

**Table S3. Comparison of performances between our models and baseline model on Dataset 1**

| Model                      | Sensitivity  | Specificity  | Precision    | Accuracy     | F1           | AUC          | AUPR        |
|----------------------------|--------------|--------------|--------------|--------------|--------------|--------------|-------------|
| Onehot+fingerprint+Dense   | 0.871        | 0.792        | 0.855        | 0.838        | 0.863        | 0.946        | 0.967       |
| Bert+fingerprint+Dense     | 0.826        | <b>0.975</b> | <b>0.979</b> | 0.888        | 0.896        | 0.941        | 0.967       |
| Onehot+fingerprint+Capsule | 0.841        | 0.944        | 0.955        | 0.884        | 0.894        | 0.944        | 0.969       |
| Bert+fingerprint+Capsule   | 0.827        | 0.974        | 0.978        | 0.888        | 0.896        | 0.921        | 0.959       |
| Onehot+MPNN+Dense          | 0.767        | 0.965        | 0.970        | 0.847        | 0.857        | 0.901        | 0.948       |
| Bert+MPNN+Dense            | 0.828        | 0.950        | 0.960        | 0.877        | 0.889        | 0.938        | 0.966       |
| Onehot+MPNN+Capsule        | <b>0.874</b> | 0.844        | 0.891        | 0.862        | 0.883        | 0.927        | 0.962       |
| <b>Bert+MPNN+Capsule</b>   | 0.836        | 0.973        | 0.978        | <b>0.893</b> | <b>0.901</b> | <b>0.946</b> | <b>0.97</b> |

**Table S4. BLASTP Result of ACE2 (Database: Dataset 1)**

| <b>Dataset</b>                                  | <b>Sequences producing significant alignments</b> | <b>Score (Bits)</b> | <b>E Value</b> |
|-------------------------------------------------|---------------------------------------------------|---------------------|----------------|
| Protein sequences<br>in positive DTI<br>Dataset | 10945                                             | 1685                | 0              |
|                                                 | 9851                                              | 1685                | 0              |
|                                                 | 11003                                             | 509                 | 5.00E-164      |
|                                                 | 9872                                              | 509                 | 5.00E-164      |
|                                                 | 9870                                              | 509                 | 5.00E-164      |
|                                                 | 9804                                              | 509                 | 5.00E-164      |
|                                                 | 9802                                              | 509                 | 5.00E-164      |
|                                                 | 9768                                              | 509                 | 5.00E-164      |
|                                                 | 9747                                              | 509                 | 5.00E-164      |
|                                                 | 9744                                              | 509                 | 5.00E-164      |
|                                                 | 9742                                              | 509                 | 5.00E-164      |
|                                                 | 9738                                              | 509                 | 5.00E-164      |
|                                                 | 9736                                              | 509                 | 5.00E-164      |
|                                                 | 9733                                              | 509                 | 5.00E-164      |
|                                                 | 9731                                              | 509                 | 5.00E-164      |
|                                                 | 8787                                              | 509                 | 5.00E-164      |
|                                                 | 14419                                             | 33.9                | 0.3            |
|                                                 | 13979                                             | 33.9                | 0.3            |
|                                                 | 13932                                             | 33.9                | 0.3            |
|                                                 | 13660                                             | 33.9                | 0.3            |
|                                                 | 13509                                             | 33.9                | 0.3            |
|                                                 | 12194                                             | 33.9                | 0.3            |
|                                                 | 11763                                             | 33.9                | 0.3            |
|                                                 | 11352                                             | 33.9                | 0.3            |
|                                                 | 11141                                             | 33.9                | 0.3            |
|                                                 | 11116                                             | 33.9                | 0.3            |
| Protein sequences<br>in negative DTI<br>Dataset | No hits found                                     |                     |                |

**Table S5. BLASTP Result of ACE2 (Database: Dataset 2)**

| <b>Dataset</b>                                  | <b>Sequences producing significant alignments</b> | <b>Score (Bits)</b> | <b>E Value</b> |
|-------------------------------------------------|---------------------------------------------------|---------------------|----------------|
| Protein sequences<br>in positive DTI<br>Dataset | 1880                                              | 27.7                | 8.3            |
|                                                 | 31532                                             | 33.9                | 0.81           |
|                                                 | 31355                                             | 33.9                | 0.81           |
|                                                 | 31352                                             | 3.39E+01            | 0.81           |
|                                                 | 30430                                             | 3.39E+01            | 0.81           |
|                                                 | 29682                                             | 3.39E+01            | 0.81           |
|                                                 | 29454                                             | 3.39E+01            | 0.81           |
|                                                 | 28918                                             | 3.39E+01            | 0.81           |
|                                                 | 28503                                             | 3.39E+01            | 0.81           |
|                                                 | 26658                                             | 3.39E+01            | 0.81           |
|                                                 | 25994                                             | 3.39E+01            | 0.81           |
|                                                 | 19602                                             | 3.39E+01            | 0.81           |
|                                                 | 18090                                             | 3.39E+01            | 0.81           |
|                                                 | 17249                                             | 3.39E+01            | 0.81           |
|                                                 | 13818                                             | 3.39E+01            | 0.81           |
|                                                 | 12839                                             | 3.39E+01            | 0.81           |
|                                                 | 12004                                             | 3.39E+01            | 0.81           |
|                                                 | 10931                                             | 33.9                | 0.81           |
| Protein sequences<br>in negative DTI<br>Dataset | 10420                                             | 33.9                | 0.81           |
|                                                 | 9576                                              | 33.9                | 0.81           |
|                                                 | 8730                                              | 33.9                | 0.81           |
|                                                 | 8399                                              | 33.9                | 0.81           |
|                                                 | 5185                                              | 33.9                | 0.81           |
|                                                 | 3803                                              | 33.9                | 0.81           |
|                                                 | 3082                                              | 33.9                | 0.81           |
|                                                 | 3070                                              | 33.9                | 0.81           |
|                                                 | 2779                                              | 33.9                | 0.81           |
|                                                 | 1466                                              | 33.9                | 0.81           |
|                                                 | 987                                               | 33.9                | 0.81           |
|                                                 | 12191                                             | 33.9                | 0.89           |
|                                                 | 7918                                              | 33.9                | 0.89           |
|                                                 | 7158                                              | 33.9                | 0.89           |
|                                                 | 5380                                              | 33.9                | 0.89           |
|                                                 | 4198                                              | 33.9                | 0.89           |
|                                                 | 4063                                              | 33.9                | 0.89           |
|                                                 | 3640                                              | 33.9                | 0.89           |
|                                                 | 3450                                              | 33.9                | 0.89           |
|                                                 | 3436                                              | 33.9                | 0.89           |

|      |      |      |
|------|------|------|
| 3200 | 33.9 | 0.89 |
| 3183 | 33.9 | 0.89 |
| 2681 | 33.9 | 0.89 |
| 1995 | 33.9 | 0.89 |
| 926  | 33.9 | 0.89 |
| 525  | 33.9 | 0.89 |
| 387  | 33.9 | 0.89 |

---



**Table S6. BLASTP Result of ACE2 (Database: Dataset 3)**

| <b>Dataset</b>                                  | <b>Sequences producing significant alignments</b> | <b>Score (Bits)</b> | <b>E Value</b> |
|-------------------------------------------------|---------------------------------------------------|---------------------|----------------|
| Protein sequences<br>in positive DTI<br>Dataset | 2564                                              | 1685                | 0              |
|                                                 | 2423                                              | 33.9                | 0.08           |
|                                                 | 1416                                              | 3.39E+01            | 0.08           |
|                                                 | 1332                                              | 3.39E+01            | 0.08           |
|                                                 | 518                                               | 3.39E+01            | 0.08           |
|                                                 | 2236                                              | 2.77E+01            | 6.2            |
|                                                 | 145                                               | 2.77E+01            | 6.2            |
| Protein sequences<br>in negative DTI<br>Dataset | 3254                                              | 1685                | 0              |
|                                                 | 1804                                              | 1685                | 0              |
|                                                 | 1274                                              | 1.69E+03            | 0              |
|                                                 | 762                                               | 1.69E+03            | 0              |
|                                                 | 3322                                              | 5.09E+02            | 1.00E-164      |
|                                                 | 3356                                              | 2.81E+01            | 3.6            |
|                                                 | 3282                                              | 2.81E+01            | 3.6            |
|                                                 | 3156                                              | 2.81E+01            | 3.6            |
|                                                 | 2238                                              | 2.81E+01            | 3.6            |
|                                                 | 1952                                              | 2.81E+01            | 3.6            |
|                                                 | 1851                                              | 2.81E+01            | 3.6            |
|                                                 | 1635                                              | 2.81E+01            | 3.6            |
|                                                 | 1339                                              | 2.81E+01            | 3.6            |
|                                                 | 963                                               | 2.81E+01            | 3.6            |

**Table S7. Drugs that interact with ACE2 with high confidence (DTI possibility > 0.9975)**

| DrugBank ID | Name                                                                                     | Drug Groups     | Interact status<br>(1: interact ; 0: non-interact ) | non-DTI possibility | DTI possibility |
|-------------|------------------------------------------------------------------------------------------|-----------------|-----------------------------------------------------|---------------------|-----------------|
| DB08152     | {(2S)-1-[N-(tert-butoxycarbonyl)glycyl]pyrrolidin-2-yl}methyl (3-chlorophenyl)acetate    | experimental    | 1                                                   | 0.0159<br>1295      | 0.9978<br>174   |
| DB00419     | Miglustat                                                                                | approved        | 1                                                   | 0.0123<br>0913      | 0.9978<br>156   |
| DB03461     | Nicotinamide adenine dinucleotide phosphate                                              | experimental    | 1                                                   | 0.0486<br>3215      | 0.9978<br>03    |
| DB03190     | 6-o-Capryloylsucrose                                                                     | experimental    | 1                                                   | 0.0075<br>0221      | 0.9977<br>8444  |
| DB13106     | Glycovir                                                                                 | investigational | 1                                                   | 0.0231<br>7203      | 0.9977<br>7514  |
| DB07413     | 5'-S-[2-(decylamino)ethyl]-5'-thioadenosine                                              | experimental    | 1                                                   | 0.0132<br>0679      | 0.9977<br>5714  |
| DB09269     | Phenylacetic acid                                                                        | approved        | 1                                                   | 0.0253<br>3052      | 0.9977<br>5684  |
| DB14085     | Cadmium                                                                                  | experimental    | 1                                                   | 0.0204<br>1934      | 0.9977<br>3604  |
| DB08132     | 5-hydroxynaphthalene-1-sulfonamide                                                       | experimental    | 1                                                   | 0.0612<br>0944      | 0.9977<br>0105  |
| DB00302     | Tranexamic acid                                                                          | approved        | 1                                                   | 0.0158<br>9582      | 0.9976<br>981   |
| DB07834     | N-(cyclopropylmethyl)-2'-methyl-5'-(5-methyl-1,3,4-oxadiazol-2-yl)biphenyl-4-carboxamide | experimental    | 1                                                   | 0.0054<br>048       | 0.9976<br>975   |
| DB12721     | RO-5028442                                                                               | investigational | 1                                                   | 0.0274<br>3089      | 0.9976<br>842   |
| DB07569     | CIS-4-METHYL-N-[(1S)-3-(METHYLSULFANYL)-1-(PYRIDIN-4-                                    | experimental    | 1                                                   | 0.0090<br>2602      | 0.9976<br>576   |

|         |                                                                                                              |                              |   |                |                |
|---------|--------------------------------------------------------------------------------------------------------------|------------------------------|---|----------------|----------------|
|         | YLCARBAMOYL)PR<br>OPYL]CYCLOHEXAN<br>ECARBOXAMIDE                                                            |                              |   |                |                |
| DB09256 | Tegafur                                                                                                      | approved;<br>investigational | 1 | 0.0121<br>8555 | 0.9976<br>538  |
| DB13209 | Bismuth subnitrate                                                                                           | approved                     | 1 | 0.0130<br>459  | 0.9976<br>4323 |
| DB15424 | Bfpet F-18                                                                                                   | investigational              | 1 | 0.0310<br>801  | 0.9976<br>42   |
| DB04800 | 1-METHYL-3-<br>PHENYL-1H-<br>PYRAZOL-5-<br>YLSULFAMIC ACID                                                   | experimental                 | 1 | 0.0182<br>131  | 0.9976<br>397  |
| DB08595 | 4-[(1S,2R,5S)-4,4,8-<br>TRIMETHYL-3-<br>OXABICYCLO[3.3.1]N<br>ON-7-EN-2-<br>YL]PHENOL                        | experimental                 | 1 | 0.0074<br>7552 | 0.9976<br>3715 |
| DB03338 | Heptyl glucoside                                                                                             | experimental                 | 1 | 0.0089<br>1036 | 0.9976<br>3316 |
| DB07215 | GW-590735                                                                                                    | investigational              | 1 | 0.0195<br>1079 | 0.9976<br>1057 |
| DB08808 | Bupranolol                                                                                                   | experimental                 | 1 | 0.0144<br>6043 | 0.9976<br>1015 |
| DB08913 | Radium Ra 223<br>dichloride                                                                                  | approved;<br>investigational | 1 | 0.0084<br>8691 | 0.9976<br>066  |
| DB07381 | (S)-atrolactic acid                                                                                          | experimental                 | 1 | 0.0408<br>9671 | 0.9976<br>06   |
| DB02316 | 1-(5-Carboxypentyl)-5-<br>[(2,6-<br>Dichlorobenzyl)Oxy]-1<br>H-Indole-2-Carboxylic<br>Acid                   | experimental                 | 1 | 0.0352<br>9239 | 0.9976<br>012  |
| DB04026 | Pseudotropine                                                                                                | experimental                 | 1 | 0.0055<br>0823 | 0.9975<br>946  |
| DB01948 | 1-(2,6-Dichlorophenyl)-<br>5-(2,4-Difluorophenyl)-<br>7-Piperidin-4-Yl-3,4-<br>Dihydroquinolin-2(1h)-<br>One | experimental                 | 1 | 0.0068<br>3042 | 0.9975<br>814  |
| DB03916 | 4-{2-[4-(2-<br>Aminoethyl)Piperazin-<br>1-Yl]Pyridin-4-Yl}-N-<br>(3-Chloro-4-                                | experimental                 | 1 | 0.0093<br>3818 | 0.9975<br>7725 |

|         |                                                                                                          |                                  |   |                |                |
|---------|----------------------------------------------------------------------------------------------------------|----------------------------------|---|----------------|----------------|
|         | Methylphenyl)Pyrimidin<br>-2-Amine<br>(R)-N-(3-Indol-1-Yl-2-<br>Methyl-Propyl)-4-<br>Sulfamoyl-Benzamide | experimental                     | 1 | 0.0120<br>5768 | 0.9975<br>734  |
| DB06697 | Artemether                                                                                               | approved                         | 1 | 0.0125<br>5393 | 0.9975<br>7123 |
| DB12767 | Gaxilose                                                                                                 | approved;<br>investigational     | 1 | 0.0255<br>3476 | 0.9975<br>5937 |
| DB05549 | INO-1001                                                                                                 | investigational                  | 1 | 0.0074<br>4648 | 0.9975<br>574  |
| DB00241 | Butalbital                                                                                               | approved; illicit                | 1 | 0.0079<br>7347 | 0.9975<br>512  |
| DB15414 | CM-4307                                                                                                  | investigational                  | 1 | 0.0139<br>0884 | 0.9975<br>4983 |
| DB09136 | Isosulfan blue                                                                                           | approved                         | 1 | 0.0084<br>4891 | 0.9975<br>4715 |
| DB03322 | Dexpropranolol                                                                                           | experimental                     | 1 | 0.0145<br>0519 | 0.9975<br>468  |
| DB15687 | Tridecactide                                                                                             | investigational                  | 1 | 0.0081<br>3702 | 0.9975<br>441  |
| DB06569 | P-57AS3                                                                                                  | investigational                  | 1 | 0.0086<br>4029 | 0.9975<br>4375 |
| DB07757 | (9aS)-4-bromo-9a-butyl-<br>7-hydroxy-1,2,9,9a-<br>tetrahydro-3H-fluoren-<br>3-one                        | experimental                     | 1 | 0.0092<br>816  | 0.9975<br>422  |
| DB07693 | N-(3,5-dibromo-4-<br>hydroxyphenyl)-2,6-<br>dimethylbenzamide                                            | experimental                     | 1 | 0.0154<br>2644 | 0.9975<br>4137 |
| DB01936 | alpha-D-<br>arabinofuranose                                                                              | experimental;<br>investigational | 1 | 0.0102<br>8795 | 0.9975<br>381  |
| DB06622 | 7-beta-<br>Hydroxyepiandrosterone                                                                        | investigational                  | 1 | 0.0111<br>6393 | 0.9975<br>3755 |
| DB06881 | (1Z)-2-HYDROXY-3-<br>OXOHEX-1-EN-1-YL<br>DIHYDROGEN<br>PHOSPHATE                                         | experimental                     | 1 | 0.0073<br>2605 | 0.9975<br>3374 |
| DB16032 | GW810781                                                                                                 | investigational                  | 1 | 0.0127<br>7663 | 0.9975<br>2307 |
| DB13425 | Flutrimazole                                                                                             | experimental                     | 1 | 0.0437<br>8571 | 0.9975<br>219  |
| DB12794 | p-Quaterphenyl                                                                                           | investigational                  | 1 | 0.0081<br>72   | 0.9975<br>169  |

|         |                                                                                    |              |   |                |                |
|---------|------------------------------------------------------------------------------------|--------------|---|----------------|----------------|
| DB08702 | 2,5-DIPHENYLFURAN-3,4-DICARBOXYLIC ACID                                            | experimental | 1 | 0.0121<br>6486 | 0.9975<br>1276 |
| DB06876 | N-{5-[4-(4-METHYLPIPERAZIN-1-YL)PHENYL]-1H-PYRROLO[2,3-B]PYRIDIN-3-YL}NICOTINAMIDE | experimental | 1 | 0.0177<br>2101 | 0.9975<br>081  |
| DB13257 | Ferrous sulfate anhydrous                                                          | approved     | 1 | 0.0092<br>0453 | 0.9975<br>042  |
| DB08077 | 2-[4-({[(3,5-DICHLOROPHENYL)AMINO]CARBONYL}AMINO)PHENOXY]-2-METHYLPROPANOIC ACID   | experimental | 1 | 0.0179<br>1428 | 0.9975<br>041  |
| DB15872 | L-alpha-Glycerophosphorylethanolamine                                              | experimental | 1 | 0.0302<br>2476 | 0.9975<br>02   |

---

**Table S8. Prediction results of PAIN substances and FDA-approved drugs with 20422 human proteins**

| Molecule type                                           | Drug Name    | PubChem<br>Compound ID | Number of DTI | Number of non-DTI |
|---------------------------------------------------------|--------------|------------------------|---------------|-------------------|
| “pan-assay<br>interference”<br>(PAIN) substances<br>[1] | gossypol     | 3503                   | 20422         | 0                 |
|                                                         | droxidopa    | 92974                  | 20422         | 0                 |
|                                                         | menadione    | 4055                   | 20422         | 0                 |
|                                                         | daunorubicin | 30323                  | 20422         | 0                 |
| FDAapproved Drug<br>[2]                                 | sorafenib    | 216239                 | 1023          | 19399             |
|                                                         | lenvatinib   | 9823820                | 1043          | 19379             |
|                                                         | regorafenib  | 11167602               | 1052          | 19370             |
|                                                         | cabozantinib | 25102847               | 1054          | 19368             |

To showcase the model's ability to distinguish drug-like molecules, we select four “pan-assay interference” (PAIN) substances and four FDA-approved drugs from the literature [2,3]. We then used our CapBM-DTI model (trained on Dataset 2) to predict the binding possibility between these eight drugs and all human proteins collected from Swiss-Prot. The results are presented in **Supplementary Table S8**. Based on the findings in Table S8, our model exhibits a certain level of discriminative performance. Specifically, PAIN substances can bind to all proteins, while FDA-approved drugs can only bind to a small number of proteins.

**Table S9. Model prediction results of 2-(2,4-dichlorophenoxy)-5-(hydroxymethyl)phenol (PubChem Compound ID: 23656595) binding to binding region and non-binding regions of Transthyretin (Uniprot ID: P00375)**

| Drug and Protein                                                                                                           | Region             | Sequence index [Start, End] | Sequence                                                                                                                                                                                       | DTI possibility            | non-DTI possibility        | DTI Status |
|----------------------------------------------------------------------------------------------------------------------------|--------------------|-----------------------------|------------------------------------------------------------------------------------------------------------------------------------------------------------------------------------------------|----------------------------|----------------------------|------------|
| 2-(2,4-dichlorophenoxy)-5-(hydroxymethyl)phenol (PubChem Compound ID: 23656595) and Transthyretin (Uniprot ID: P00375) [3] | Full sequence      | [1,147]                     | MASHRLLLLCLAGL<br>VVFVSEAGPTGTGES<br>KCPLMVKVLD AVR<br>GSPAINVAVHVFRKA<br>ADDTWEPFASGKTS<br>ESGELHGLTTEEEFV<br>EGIYKVEIDTKSYW<br>KALGISPFHEHA EVV<br>FTANDSGPRRYTIAA<br>LLSPYSYSTTAVVTN<br>PKE | 0.87235<br>2063655<br>8533 | 0.58634<br>2573165<br>8936 | 1          |
|                                                                                                                            | Binding region     | [28, 43]                    | SKCPLMVKVLD AVR<br>GS                                                                                                                                                                          | 0.96840<br>1849269<br>866  | 0.14755<br>8823227<br>882  | 1          |
|                                                                                                                            |                    | [69, 78]                    | TSESGELHGL                                                                                                                                                                                     | 0.96840<br>1849269<br>866  | 0.14770<br>6046700<br>477  | 1          |
|                                                                                                                            |                    | [108, 117]                  | HEHA EVVFTA                                                                                                                                                                                    | 0.96839<br>1358852<br>386  | 0.14752<br>1197795<br>867  | 1          |
|                                                                                                                            |                    | [121, 147]                  | GPRRYTIAALLSPYS<br>YSTTAVVTNPKE                                                                                                                                                                | 0.96840<br>1610851<br>287  | 0.14770<br>6136107<br>444  | 1          |
|                                                                                                                            | Non-binding region | [1,27]                      | MASHRLLLLCLAGL<br>VVFVSEAGPTGTGE                                                                                                                                                               | 0.64513<br>2422447<br>204  | 0.98751<br>6880035<br>4    | 0          |
|                                                                                                                            |                    | [44,68]                     | PAINVAVHVFRKAA<br>DDTWEPFASGK                                                                                                                                                                  | 0.64521<br>9445228<br>576  | 0.98751<br>4972686<br>767  | 0          |
|                                                                                                                            |                    | [79,107]                    | TTEEEFVEGIYKVEI<br>DTKSYWKALGISPF                                                                                                                                                              | 0.64521<br>9087600<br>708  | 0.98751<br>5211105<br>346  | 0          |
|                                                                                                                            |                    | [118,120]                   | NDS                                                                                                                                                                                            | 0.43058<br>0437183<br>38   | 0.27902<br>4273157<br>119  | 1          |

As a case study, we utilized the full-length sequence, binding sequence and non-binding sequence of Transthyretin (Uniprot ID: P00375) binding to 2-(2,4-

dichlorophenoxy)-5-(hydroxymethyl)phenol (PubChem Compound ID: 23656595) [3] to assess the model's ability to identify specific amino acids that are in close proximity to viable and druggable targets. **Supplementary Table S9** demonstrates that, with the exception of the short sequence “NDS” in the non-binding region (which leads to inaccurate model prediction), the model accurately predicts whether the other sequences bind to the compound, which showcases the discriminative performance of our proposed model (trained on Dataset 2) in this task.



**Table S10. Model prediction results of (S)-blebbistatin analogs**

| Drug Name                                                                                       | PubChem Compound ID | IC50 (μM) | DTI possibility            | non-DTI possibility                 | DTI Status | Structure                                                                             |
|-------------------------------------------------------------------------------------------------|---------------------|-----------|----------------------------|-------------------------------------|------------|---------------------------------------------------------------------------------------|
| N-[3-[(3aS)-3a-hydroxy-6-methyl-4-oxo-2,3-dihydropyrrolo[2,3-b]quinolin-1-yl]phenyl]propanamide | 14595468<br>1       | <0.02     | 0.7770<br>342826<br>843262 | 0.466<br>6823<br>4467<br>5064<br>1  | 1          | 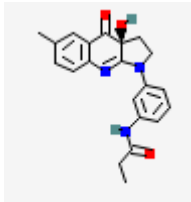   |
| (3aS)-3a-hydroxy-6-methyl-1-naphthalen-2-yl-2,3-dihydropyrrolo[2,3-b]quinolin-4-one             | 14595571<br>6       | <0.02     | 0.7468<br>130588<br>531494 | 0.613<br>9199<br>1376<br>8768<br>3  | 1          |   |
| (3aS)-1-(2,3-dihydro-1H-indol-6-yl)-3a-hydroxy-6-methyl-2,3-dihydropyrrolo[2,3-b]quinolin-4-one | 14597359<br>6       | 0.11      | 0.7070<br>441246<br>032715 | 0.447<br>8471<br>2791<br>4428<br>7  | 1          |  |
| (3aS)-3a-hydroxy-1-(1H-indol-6-yl)-6-methyl-2,3-dihydropyrrolo[2,3-b]quinolin-4-one             | 14597119<br>7       | 0.12      | 0.7852<br>638959<br>884644 | 0.389<br>8260<br>5934<br>1430<br>66 | 1          |  |
| (3aS)-3a-hydroxy-6-methyl-1-phenyl-2,3-dihydropyrrolo[2,3-b]quinolin-4-one                      | 5287792             | 1         | 0.5900<br>148153<br>305054 | 0.492<br>0700<br>4904<br>7470<br>1  | 1          |  |

|                                                                                            |               |     |                                           |                      |   |                                                                                     |
|--------------------------------------------------------------------------------------------|---------------|-----|-------------------------------------------|----------------------|---|-------------------------------------------------------------------------------------|
| (3aS)-3a-hydroxy-6-methyl-1-(4-prop-2-enoxyphenyl)-2,3-dihydropyrrolo[2,3-b]quinolin-4-one | 14595138<br>6 | 2.3 | 0.491<br>0.5935<br>986638<br>069153<br>34 | 8572<br>9026<br>7944 | 1 | 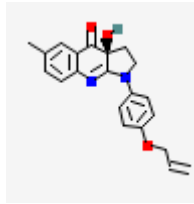 |
| (3aS)-3a-hydroxy-6-methyl-1-(4-nitrophenyl)-2,3-dihydropyrrolo[2,3-b]quinolin-4-one        | 10236173<br>9 | 2.5 | 0.293<br>0.3495<br>916724<br>205017<br>7  | 9663<br>5293<br>9605 | 1 |  |

(S)-blebbistatin (Compound CID: 5287792) is a widely used compound in the study of myosin II (UniprotID: Q9UKX2), an important regulator of many motor disorders. Although its potency is too low to be clinically significant, identifying analogs with enhanced potency could provide insights for targeted drug therapy. In this study [4], the compound was modified, and the IC<sub>50</sub> value against the target myosin II was determined. We utilized our CapBM-DTI model (trained on Dataset 2) to predict the binding possibility of these compounds to target proteins myosin II and obtained **Supplementary Table S10**. The result in **Table S10** demonstrate that the DTI possibilities predicted by our model strongly correlate with IC<sub>50</sub> value, indicating the practicality of our model in the lead optimization.

## Reference

1. Baell JB. Feeling nature's PAINS: natural products, natural product drugs, and pan assay interference compounds (PAINS), *Journal of natural products* 2016;79:616-628.
2. Rimassa L. Drugs in development for hepatocellular carcinoma, *Gastroenterology & hepatology* 2018;14:542.
3. Lee I, Nam H. Sequence-based prediction of protein binding regions and drug–target interactions, *Journal of cheminformatics* 2022;14:1-15.
4. Verhasselt S, Roman BI, Bracke ME et al. Improved synthesis and comparative analysis of the tool properties of new and existing D-ring modified (S)-blebbistatin analogs, *Eur J Med Chem* 2017;136:85-103.
